# Supplementary material for: Sources of reactive nitrogen in marine aerosol over the Northwest Pacific Ocean in spring
Source: Copernicus journal article supplement (doi:10.5194/acp-2017-846), 2017-09-25
Supplement: Supplementary file [file acp-2017-846-AC3-supplement.zip]

# Sources of reactive nitrogen in marine aerosol over the Northwest Pacific Ocean in spring

Li Luo<sup>1,3</sup>, Shuh-Ji Kao<sup>2\*</sup>, Hongyan Bao<sup>2</sup>, Huayun Xiao<sup>1,3</sup>, Hongwei Xiao<sup>1,3</sup>, Xiaohong Yao<sup>4</sup>, Huiwang Gao<sup>4</sup>, Jiawei Li<sup>5</sup>, Yangyang Lu<sup>2</sup>

<sup>1</sup>Jiangxi Province Key Laboratory of the causes and control of Atmospheric pollution, East China University of Technology, Nanchang 330013, China

<sup>2</sup>State Key Laboratory of Marine Environmental Science, Xiamen University, Xiamen 361102, China

<sup>3</sup>School of Water Resources and Environmental Engineering, East China University of Technology, Nanchang 330013, China

<sup>4</sup>Key laboratory of Marine Environmental Science and Ecology, Ministry of Education, Ocean University of China, Qingdao 266100, China

<sup>5</sup>Key Laboratory of Regional Climate-Environment for Temperate East Asia, Institute of Atmospheric Physics, Chinese Academy of Sciences, Beijing 100029, China

*Correspondence to:* Shuh-Ji Kao (sjkao@xmu.edu.cn)

**Abstract** Atmospheric deposition of long-range transport of anthropogenic reactive nitrogen (Nr, mainly comprised of  $\text{NH}_x$ ,  $\text{NO}_y$  and water-soluble organic nitrogen (WSON)) from continents may have profound impact on marine biogeochemistry. On the other hand, surface ocean dissolve organic nitrogen (DON) may also contribute to aerosol WSON in the overlying atmosphere. Despite of the importance of off-continent dispersion and Nr interactions at the atmosphere-ocean boundary, our knowledge of the sources of various nitrogen species in the atmosphere over the open ocean remains limited due to insufficient observations. In the spring of 2014 and 2015, we conducted two cruises from the coast of China through the East China Seas (ECSs, i.e. the Yellow Sea and East China Sea) to the open ocean (i.e. the Northwest Pacific Ocean, NWPO). Concentrations of water-soluble total nitrogen (WSTN),  $\text{NO}_3^-$  and  $\text{NH}_4^+$ , as well as the  $\delta^{15}\text{N}$  of WSTN and  $\text{NO}_3^-$  in marine aerosol were measured during both cruises. In the spring of 2015, we also analysed the concentrations and  $\delta^{15}\text{N}$  of  $\text{NO}_3^-$  and the DON of surface sea water (SSW; at a depth of 5 m) along the cruise track. Aerosol  $\text{NO}_3^-$ ,  $\text{NH}_4^+$  and WSON decreased logarithmically (1-2 orders of magnitude) with distance from the shore, reflecting strong anthropogenic emission sources of  $\text{NO}_3^-$ ,  $\text{NH}_4^+$  and WSON in China. Average aerosol  $\text{NO}_3^-$  and  $\text{NH}_4^+$  concentrations were significantly higher in 2014 (even in the remote NWOP) than in 2015 due to the stronger wind field in 2014, underscoring the role of the Asian winter monsoon in seaward transport of anthropogenic  $\text{NO}_3^-$  and  $\text{NH}_4^+$ . However, the background aerosol WSON over the NWPO in 2015 ( $12.7 \pm 8.7 \text{ nmol m}^{-3}$ ) was similar to that in 2014 ( $10.7 \pm 7.0 \text{ nmol m}^{-3}$ ), suggesting an additional non-anthropogenic WSON source in the open ocean. Obviously, marine DON emissions should be considered in model and field assessments of net atmospheric WSON deposition in the open ocean. This study contributes parallel isotopic marine DON composition and aerosol Nr datasets; however, more research is required to explore complex Nr sources and deposition processes in order to advance our understanding of anthropogenic influences on the marine nitrogen cycle and nitrogen exchange at land-ocean and atmosphere-ocean interfaces.

## 1 Introduction

Atmospheric transport and deposition of anthropogenic reactive nitrogen (Nr) to global oceans have increased considerably since the industrial revolution (Duce et al., 2008). Due to accumulated atmospheric Nr deposition, the stoichiometric relationship between nitrogen and phosphorous in the upper North Pacific Ocean (where nitrogen is the limiting nutrient in surface ocean) has been significantly altered (Kim et al., 2011). Such alterations may in turn impact pristine oceanic ecosystems and biogeochemical cycles. The Nr species deposited in the ocean include inorganic reduced nitrogen species ( $\text{NH}_3$  and  $\text{NH}_4^+$ ), oxidized nitrogen species ( $\text{HNO}_3$  and  $\text{NO}_3^-$ ), and organic nitrogen compounds (Erisman et al., 2002). The depositional fluxes (both dry and wet) of atmospheric Nr to global oceans have been studied previously through models (Duce et al., 2008; Doney et al., 2010). Recent model (Kanakidou et al., 2012) and observational (Altieri et al., 2014, 2016) studies have also reported that the ocean may be a source of atmospheric WSON and  $\text{NH}_3$ . Nevertheless, field observations in the open ocean are still scarce; thus, more observations and new approaches, such as stable nitrogen isotopic composition studies, are urgently needed to trace the sources of Nr and investigate Nr exchange at the atmosphere-ocean interface.

Using organic nitrogen compounds, Cape et al. (2011) revealed several possible sources of WSON in the atmosphere, including livestock and animal husbandry, fertilizers, vehicle exhaust, biomass burning, secondary pollutants, and marine biological sources. Cape et al. (2011) also noted explicitly that complex atmospheric chemical process may obscure source identification for individual organic N compounds in atmospheric WSON. Stochastic analysis coupled with molecular characterization using FT-ICR-MS revealed that biological organic nitrogen in surface sea water can be a source of atmospheric WSON over the open ocean (Wozniak et al., 2014; Altieri et al., 2016); similar conclusions have been drawn from the positive correlation between marine aerosol WSON concentration and wind speed during a cruise in the Northwest Pacific Ocean (Luo et al., 2016).

The stable nitrogen isotopic composition ( $\delta^{15}\text{N}$ ,  $\delta^{15}\text{N}(\text{‰})_{\text{sample}} = ((^{15}\text{N}/^{14}\text{N})_{\text{sample}}/(^{15}\text{N}/^{14}\text{N})_{\text{standard}} - 1) \times 1000$ ) may be used to discriminate the sources of atmospheric  $\text{NO}_x$  and  $\text{NH}_x$ . This approach (i.e. the use of  $\delta^{15}\text{N}\text{-NO}_x$ ) has successfully distinguished fossil fuel burning  $\text{NO}_x$  from soil biogenic activity  $\text{NO}_x$  (Felix and Elliott, 2014), as well as coal combustion emissions (Felix et al., 2012) from vehicle exhaust (Walters et al., 2015). Similarly, atmospheric  $\text{NH}_x$  can be measured and traced using  $\delta^{15}\text{N}\text{-NH}_x$  (Freyer, 1978; Heaton, 1987; Jickells, 2003; Altieri et al., 2014). However, direct measurements of atmospheric  $\delta^{15}\text{N}\text{-WSON}$  are currently highly impractical due to difficulties in completely separating organic and inorganic nitrogen. Via isotope mass conservation, a few previous studies have reported  $\delta^{15}\text{N}\text{-WSON}$  values in precipitation collected from urban, rural and remote regions ranging from  $-7.3$  to  $+7.3\text{‰}$  (Cornell et al., 1995), which is consistent with values from precipitation sampled in a metropolis surrounded by agricultural areas in southern Korea ( $-7.9$  to  $+3.8\text{‰}$ , with annual means of  $+0.3\text{‰}$  and  $+0.2\text{‰}$  in 2007 and 2008, respectively; Lee et al., 2012), but lower than the  $\delta^{15}\text{N}\text{-WSON}$  values ( $-0.5$  to  $+14.7\text{‰}$ , with a median of  $+5\text{‰}$  and non-significant seasonal variation) reported in precipitation over the US East Coast area (Russell

et al., 1998). Compared with those for precipitation, aerosol  $\delta^{15}\text{N}$ -WSON values reported in various rural regions in the UK cover a wider range (mainly caused by low values; the range covers  $-14.6$  to  $+12.5\text{‰}$ , with medians of  $-2\text{‰}$  and  $-5\text{‰}$  for the fine and coarse mode, respectively; Kelly et al., 2005) (Fig. S1). Using  $\delta^{15}\text{N}$ , it is more difficult to identify the sources of atmospheric WSON than it is to identify  $\text{NO}_x$  and  $\text{NH}_x$  sources. However, the relatively uniform  $\delta^{15}\text{N}$  values ( $+2.2$  to  $+5.4\text{‰}$ ) of dissolved organic nitrogen (DON) in surface sea water worldwide (Knapp et al., 2005; Knapp et al., 2011) enable the use of the isotope end member mixing approach for **primary WSON aerosol**; unfortunately, no cruises to date have undertaken parallel marine aerosol sampling and surface sea water  $\delta^{15}\text{N}$  identification.

In terms of the hemispheric wind field, the East Asian monsoon transition from winter (October to April) to summer (May to September) influences the whole East Asian region. During the East Asian winter monsoon period, strong cold air masses mobilize rapidly through north-eastern China to the NWPO; in contrast, summer monsoon air masses arise primarily from the tropical Pacific Ocean (Wang et al., 2003). Air masses originating from China in winter have been reported to contain higher concentrations of  $\text{NO}_x$  and  $\text{NH}_x$  than air masses arising from remote Pacific Ocean regions in summer (Kunwar et al., 2014). Monitoring over the NWPO at Hedo Island and Ogawasara Island also shows that the dry deposition of aerosol  $\text{NO}_3^-$  and  $\text{NH}_4^+$  varies inter-annually by a factor of 2-5 due to variable monsoon intensity (<http://www.eanet.asia/>). Meanwhile, dust storms occur frequently during monsoonal transition periods, and long-range transport in the upper- and mid-troposphere through northern China to the remote Pacific Ocean (Yang et al., 2013); these dust plumes contain abundant crustal elements in addition to  $\text{NO}_x$  and  $\text{NH}_x$  (Duce et al., 1980; Kang et al., 2009). In order to evaluate the seaward gradient of atmospheric Nr concentrations and explore the sources and fates of atmospheric  $\text{NO}_3^-$ ,  $\text{NH}_4^+$  and WSON from China (which features the largest emissions of such species worldwide), we conducted cruises from China to the Northwest Pacific Ocean during spring, during which the East Asian monsoon transition period occurs; cruises were complete during two different years to allow comparison.

In this study, we measured WSTN,  $\text{NO}_3^-$  and  $\text{NH}_4^+$  concentrations, as well as  $\delta^{15}\text{N}$ -WSTN and  $\delta^{15}\text{N}$ - $\text{NO}_3^-$  in marine aerosols collected over the ECSs and the NWPO during spring 2014 and 2015. The concentrations and  $\delta^{15}\text{N}$  of DON and  $\text{NO}_3^-$  in **SSW (surface sea water, collected at 5 m depth)** were analysed in parallel along the cruise track in 2015. The purposes of this study are (1) to investigate the spatial distributions of concentrations of various Nr species in marine aerosol from the ECSs to the NWPO, (2) to explore possible sources of atmospheric WSON in marine environments, and 3) to advance our understanding of atmospheric Nr transport at the land-ocean boundary and potential Nr exchanges between the atmosphere and the ocean.

## 2 Material and Methods

### 2.1 Sampling and background weather during cruises

Total suspended particulate samples were collected using a high-volume sampler (TE-5170D; Tisch Environmental, Inc.) with Whatman®41 cellulose filters during two research cruises (Fig. 1) aboard the R/V *Dongfanghong II*. The first cruise (Fig. 1a) spanned 17 March to 22 April 2014 (44 samples were collected in total; detailed sampling information can be found in Luo et al., 2016), and the second cruise (Fig. 1b) lasted from 30 March to 3 May 2015 (38 samples were collected in total; detailed sampling information, including the date, time period and location for each sample are listed in Table S1). To avoid self-contamination from the research vessel, the TSP sampler was installed on the top of the tower at the ship head, and aerosols were sampled only during travel. More information about self-contamination from ship exhaust can be found in Luo et al. (2016). Both cruises were undertaken during the East Asian monsoon transition period. The 2-month average (March and April) wind streamlines at 1000 hPa over the NWPO show that the wind speed ranged from 2 to 6 m s<sup>-1</sup> in 2014 (Fig. 1a) and from 1 to 3 m s<sup>-1</sup> in 2015 (Fig. 1b). In general, the wind was stronger in 2014 than in 2015 over the open ocean during the sampling periods.

Meteorological data, including wind speed, direction, relative humidity (RH) and ambient temperature, is shown in Figure S2 for the 2015 cruise (data for the 2014 cruise is reported in Luo et al., 2016). In the ECSs, both cruises encountered sea fog, which inevitably influenced aerosol sampling and, of course, aerosol chemistry. Because of the analogous weather conditions experienced during the two cruises, we used the techniques of Luo et al. (2016) to classify the 2015 marine aerosol samples into three types (namely, sea-fog-modified aerosol (orange triangles) collected in the ECSs, dust aerosol (pink circles), and background aerosol (black squares) sampled in the NWPO; Fig. 1) based on the meteorological conditions (Fig. S2), concentrations of aluminium (data not shown), and the Lidar browse images from NASA (Fig. S3). Hereafter, we define background aerosol as aerosol not impacted by either dust or sea fog; rather than representing pristine conditions, the background is an environmental baseline collected within the study area during the investigation period.

To examine the relationships between the isotopic compositions of WSON in marine aerosol and DON in SSW, we collected SSW (at a depth of 5 m; sampling locations are shown in Fig. 1b as open blue circles) using Niskin bottles during the 2015 cruise. The SSW samples were filtered using a 0.22 µm MILLEX•GP filter and kept frozen at -20 °C in 50 mL 450 °C pre-combusted brown glass tubes until analysis.

### 2.2 Chemical analyses

#### 2.2.1 NO<sub>3</sub><sup>-</sup> and NH<sub>4</sub><sup>+</sup> in marine aerosol

The marine aerosol samples were extracted in Milli-Q water (specific resistivity of 18.2 MΩ cm<sup>-1</sup>) following Luo et al. (2016). The aerosol extracts were analysed using an ion chromatograph (model ICS-1100 for anions and model ICS-900 for

cations) equipped with a conductivity detector (ASRS-ULTRA) and suppressor (ASRS-300 for the ICS-1100 and CSRS-300 for the ICS-900). The precision was better than 5% for all ionic species. Details of the analytical processes can be found in Hsu et al. (2014). Only five of the aerosol samples contained detectable  $\text{NO}_2^-$ , and these accounted for < 1% of the WSTN. Eight filters of the same type as those used to collect samples were taken as blanks. All blank filters and aerosol samples were stored at  $-20^\circ\text{C}$  during the sampling periods and underwent the same extraction procedure. The  $\text{NO}_3^-$ ,  $\text{NH}_4^+$  and WSON content of the blank filters comprised less than 1%, 4% and 9%, respectively, of the average concentration of the corresponding N species in the aerosol samples.

### 2.2.2 $\text{NO}_3^-$ in SSW

The SSW  $\text{NO}_3^-$  concentration was measured using a chemiluminescence method (Braman and Hendrix, 1989). Briefly, the solution containing  $\text{NO}_3^-$  was injected into a heated solution of acidic Vanadium (III), in which the  $\text{NO}_3^-$  was reduced to nitric oxide (NO) to be measured by a  $\text{NO}_x$  analyser (MODEL T200U, Teledyne Technologies Incorporated, USA). Working standards were injected after every 10 samples. The relative standard deviation for the standard replicate was < 5%. The concentration of  $\text{NO}_2^-$  in the SSW was below the  $0.1\text{ }\mu\text{mol L}^{-1}$  detection limit throughout the cruise, as reported previously (Adornato et al., 2005).

### 2.2.3 WSTN in marine aerosol and total dissolve nitrogen in SSW

Aerosol WSTN and SSW total dissolved nitrogen (TDN, i.e.  $\text{NO}_3^- + \text{NH}_4^+ + \text{DON}$ ) were measured using the alkaline potassium persulfate oxidation method to convert WSTN and TDN to  $\text{NO}_3^-$  (Luo et al., 2016; Knapp et al., 2005). The  $\text{NO}_3^-$  content of the digested solution was then measured via chemiluminescent detection (Braman and Hendrix, 1989). To verify the WSTN and TDN oxidation efficiency, N-containing organic and inorganic compound standards (specifically, glycine, urea, ethylene diamine tetraacetic acid, and ammonium sulphate) were prepared in solution at a concentration of  $800\text{ }\mu\text{M-N}$  for oxidation analysis. The recoveries of the N-containing compound standards under oxidation by alkaline potassium persulfate were within 95 ~ 105% ( $n = 6$ ).

### 2.2.4 Stable nitrogen isotope

The  $\delta^{15}\text{N-NO}_3^-$  was analysed using the denitrifier method described by Sigman et al. (2001) and Casciotti et al. (2002), which has been widely used to analyse the  $\delta^{15}\text{N}$  in  $\text{NO}_3^-$  in aerosol, rainwater and sea water (Altieri et al., 2013; Buffam and McGlathery, 2003; Gobel et al., 2013; Hastings et al., 2003; Sigman et al., 2005), as well as that in  $\text{NO}_3^-$  in solutions digested with alkaline potassium persulfate (Knapp et al., 2005; Knapp et al., 2010; Knapp et al., 2011; Knapp et al., 2012). Detailed stable nitrogen isotope analysis procedures can be found in Archana et al. (2016) and Yang et al. (2014). Briefly,  $\text{NO}_3^-$  was reduced to  $\text{N}_2\text{O}$  by the denitrifying bacteria *Pseudomonas aureofaciens* (ATCC 13985); then, the stable nitrogen isotope of  $\text{N}_2\text{O}$  was analysed using a GasBench II connected to a continuous flow isotope ratio mass spectrometer (IRMS, Thermo Delta

V Advantage). Two international standards, USGS34 and IAEA-N3 (Böhlke et al., 2003), and two nitrate laboratory working standards were used to verify instrument stability. After the WSTN and TDN were oxidized to  $\text{NO}_3^-$ , the  $\delta^{15}\text{N}$ -WSTN and  $\delta^{15}\text{N}$ -TDN were analysed using the same procedures employed for  $\text{NO}_3^-$ . The pooled standard deviations for replicates were  $\pm 0.2\text{‰}$ ,  $\pm 0.5\text{‰}$  and  $\pm 0.5\text{‰}$  for  $\delta^{15}\text{N}$ - $\text{NO}_3^-$ ,  $\delta^{15}\text{N}$ -WSTN and  $\delta^{15}\text{N}$ -TDN, respectively.

### 2.3 Data analysis

The concentrations of WSON in marine aerosol, which cannot be measured directly (as mentioned previously), were calculated using the following equation:

$$[\text{WSON}] = [\text{WSTN}] - [\text{NO}_3^-] - [\text{NH}_4^+], \quad (1)$$

where  $[\text{WSTN}]$ ,  $[\text{NO}_3^-]$  and  $[\text{NH}_4^+]$  are the molar concentrations ( $\text{nmol N m}^{-3}$ ) of the given water-soluble nitrogen species in marine aerosol. The standard errors propagated through the WSON calculation for the 2014 data can be found in Luo et al. (2016). For 2015, the standard errors propagated through WSON calculation varied from sample to sample from 7 to 210%; the average standard error of all samples was 33%.

Reduced nitrogen (RN, i.e.  $\text{NH}_4^+ + \text{WSON}$ ) and the  $\delta^{15}\text{N}$ -RN in the aerosol were calculated by mass balance via:

$$[\text{RN}] = [\text{WSTN}] - [\text{NO}_3^-], \quad (2)$$

$$\delta^{15}\text{N-RN} = (\delta^{15}\text{N-WSTN} * [\text{WSTN}] - \delta^{15}\text{N-NO}_3^- * [\text{NO}_3^-]) / [\text{RN}], \quad (3)$$

where  $[\text{WSTN}]$  and  $[\text{NO}_3^-]$  are the molar concentrations ( $\text{nmol N m}^{-3}$ ) of the given water-soluble nitrogen species in the marine aerosol. The average propagated standard error for RN was 9% for both 2014 and 2015. The propagated error for the calculation of  $\delta^{15}\text{N-RN}$  was  $\pm 0.6\text{‰}$ .

Similar to aerosol WSON, the SSW DON concentration and  $\delta^{15}\text{N}$ -DON were calculated using the following equations:

$$[\text{DON}] = [\text{TDN}] - [\text{NO}_3^-], \quad (4)$$

$$\delta^{15}\text{N-DON} = (\delta^{15}\text{N-TDN} * [\text{TDN}] - \delta^{15}\text{N-NO}_3^- * [\text{NO}_3^-]) / [\text{DON}], \quad (5)$$

where  $[\text{TDN}]$  and  $[\text{NO}_3^-]$  are the molar concentrations ( $\mu\text{mol N L}^{-1}$ ) of the given species in SSW. The standard error propagated through the DON calculation was 5.3%. Since the average  $[\text{NH}_4^+]$  in SSW at the selected sites during the 2015 cruise (12 sites and 23 samples) was  $0.05 \mu\text{M}$ , which is much less than DON in  $\mu\text{M}$  level, thus,  $[\text{NH}_4^+]$  is neglected in Equations 4 and 5. Unfortunately, most of the  $\text{NO}_3^-$  concentrations in the 5 m SSW samples were  $< 0.5 \mu\text{mol L}^{-1}$ , which is too low for the measurement of  $\delta^{15}\text{N-NO}_3^-$ . We attempted to evaluate the interference from nitrate in the  $\delta^{15}\text{N-DON}$  calculations. For all the SSW samples on average,  $\text{NO}_3^-$  comprised 5.7% of the total  $\text{NO}_3^-$  plus DON; the  $\delta^{15}\text{N-NO}_3^-$  in SSW ranged from +8.2‰ to +16.4‰ in our measurements, and the bias of the calculated  $\delta^{15}\text{N-DON}$  varied from +0.5‰ to +0.9‰.

The dry deposition N fluxes were calculated via:

$$F = C_i \times V_i, \quad (7)$$

where  $C_i$  is the concentration of a given water-soluble nitrogen species in the aerosol, and  $V_i$  is the given dry deposition velocity

of the given nitrogen species. The deposition velocities of water-soluble nitrogen species used herein were  $2 \text{ cm s}^{-1}$  for nitrate,  $0.1 \text{ cm s}^{-1}$  for ammonium, and  $1.0 \text{ cm s}^{-1}$  for WSON, which were consistent with our previous studies (Luo et al., 2016).

### 3 Results and Discussion

#### 3.1 Spatial and temporal variations of water-soluble nitrogen species in the aerosol

Overall, significant logarithmic decreases can be seen from shore seaward for all water-soluble nitrogen species and WSTN in both 2014 and 2015 (Fig. 2). The seaward gradient was caused primarily by continental emissions influenced by sea fog (Luo et al., 2016); thus, concentrations were high in the ECSs (orange triangles in Fig. 2) and low offshore in the NWPO background aerosol (black squares in Fig. 2). Dust aerosol (pink circles in Fig. 2) appeared sporadically in the NWPO and generally featured higher  $\text{NH}_4^+$  and  $\text{NO}_3^-$  (but not WSON) values (Table 1 and Fig. 2).

The measured WSTN concentrations in TSP varied from 21 to  $2411 \text{ nmol m}^{-3}$  (Table 1 and Fig. 2a and 2b), lower than those in  $\text{PM}_{10}$  sampled during spring in Xi'an, China (which ranged from 786 to  $3000 \text{ nmol m}^{-3}$ ; Wang et al., 2013), but higher than those in TSP sampled in Sapporo, Japan (which ranged from 20.9 to  $108.6 \text{ nmol m}^{-3}$ ; Pavuluri et al., 2015), Okinawa Island (which ranged from 5 to  $216 \text{ nmol m}^{-3}$ ; Kunwar and Kawamura, 2014), and the North Pacific (which ranged from 1.4 to  $64.3 \text{ nmol m}^{-3}$  in May-July; Hoque et al., 2015). This wide range of aerosol WSTN content illustrates the influence of the distance between sampling locations and emission sources (Matsumoto et al., 2014), seasonality (Kunwar and Kawamura, 2014), and meteorological conditions, such as sea fog (Luo et al., 2016).

The concentrations of marine aerosol WSTN in the ECSs ranged from 444 to  $2411 \text{ nmol m}^{-3}$  in 2014 (with a volume-weighted mean of  $1136 \text{ nmol m}^{-3}$ ) and from  $92.9 \text{ nmol m}^{-3}$  to  $1195 \text{ nmol m}^{-3}$  in 2015 (with a volume-weighted mean of  $287 \text{ nmol m}^{-3}$ ), which were clearly higher than those in dust aerosol (with volume-weighted means of  $242 \text{ nmol m}^{-3}$  in 2014 and  $154 \text{ nmol m}^{-3}$  in 2015) and background aerosol (with volume-weighted means of  $85.6 \text{ nmol m}^{-3}$  in 2014 and  $42.3 \text{ nmol m}^{-3}$  in 2015) collected in the NWPO (Table 1). The air mass backward trajectories (see Fig. S5 for 2015 and Luo et al., 2016 for 2014) reveal that the high aerosol water-soluble nitrogen species in the ECSs arose from anthropogenic Nr emissions from eastern China (Gu et al., 2012). In addition, frequent formation of sea fog in the ECSs in spring (Zhang et al., 2009) may also enrich the amount of water-soluble nitrogen in sea-fog-modified aerosol via chemical processing (Luo et al., 2016). The much higher water-soluble nitrogen species in the ECSs marine aerosol (compared to that in the NWPO aerosol) indicates that continental/anthropogenic Nr strongly affected the marine aerosol. However, the amounts of sea-salt ions (such as  $\text{Na}^+$ ) in the ECSs aerosols sampled in both 2014 ( $123 \pm 98 \text{ nmol m}^{-3}$ ; Luo et al., 2016) and 2015 ( $151 \pm 164 \text{ nmol m}^{-3}$ ; Luo et al., unpublished data) were higher than those in land aerosol sampled during spring ( $23 \pm 7.8 \text{ nmol m}^{-3}$  in Beijing; Zhang et al., 2013), which implies that those aerosols sampled in the ECSs were also significantly influenced by sea salt. Thus, we define the aerosol collected by ship over the ECSs as marine aerosol.

In the NWPO, higher WSTN values were observed in dust aerosol than in background aerosol in both 2014 and 2015; the dust aerosol WSTN consisted predominantly of  $\text{NH}_4^+$  and  $\text{NO}_3^-$  rather than WSON (Table 1, pink circles in Fig. 2), which implies that dust can carry more  $\text{NH}_4^+$  and  $\text{NO}_3^-$  during long-range transport from East Asia to the NWPO during the Asian winter monsoon in spring. The air mass back trajectories of those dust aerosols arose mainly from high-Nr regions, as evidenced by dust plumes captured by Lidar browse images from NASA (Fig. S3 for 2015 and Luo et al., 2016 for 2014).

In our observations, the concentrations of  $\text{NH}_4^+$  and  $\text{NO}_3^-$  were higher in all aerosols in 2014 than they were in 2015 (Fig. 3a and 3b; Table 1). The difference between the two years was caused by a stronger Asian winter monsoon in 2014. Additionally, the cruise in 2014 (17 March to 22 April) occurred during a period of intensive coal and/or fossil fuel combustion for heat supply in northern China; in contrast, the 2015 cruise started on 30 March and finished on 3 May, during a hiatus in heating demand. The influence of heating on aerosol emissions can be seen in the atmospheric aerosol optical depth over heat-generating areas in China; for example, Xiao et al. (2015) reported that the aerosol optical depth was five times higher during heat generation periods than during non-generation period. The consistent variations between heat supply in northern China and higher  $\text{NO}_3^-$  in marine aerosol sampled in 2014 than 2015 underscore the influence of anthropogenic  $\text{NO}_x$  emissions on marine aerosol  $\text{NO}_3^-$ . Our spring observations in 2014 and 2015 showed average concentrations of  $\text{NH}_4^+$  and  $\text{NO}_3^-$  in background aerosol (black boxes in Fig. 3a and 3b; Table 1) higher than the average concentrations ( $3.5 \pm 3.3 \text{ nmol m}^{-3}$  for  $\text{NH}_4^+$  and  $2.1 \pm 1.5 \text{ nmol m}^{-3}$  for  $\text{NO}_3^-$ ) reported in the western Pacific Ocean in summer (blue boxes in Fig. 3a and 3b, data from Miyazaki et al., 2011 and Jung et al., 2013), which suggests far-reaching influence of anthropogenic emissions during the monsoon transition. Moreover, concentrations of  $\text{NH}_4^+$  and  $\text{NO}_3^-$  were higher in 2014 due to the stronger Asian winter monsoon, which further supports the idea that the monsoon exerts an important control on annual and seasonal variations in marine aerosol Nr via atmospheric long-range transport.

Unlike  $\text{NH}_4^+$  and  $\text{NO}_3^-$ , WSON concentrations in the background aerosol sampled in the NWPO in 2014 (average =  $10.7 \pm 7.0 \text{ nmol m}^{-3}$ ) were similar to those in 2015 (average =  $12.7 \pm 8.7 \text{ nmol m}^{-3}$ ; black boxes in Fig. 3c). In the open ocean, apart from terrestrial and anthropogenic WSON long-range transport (Mace et al., 2003; Lesworth et al., 2010), the ocean itself is the most likely source of marine aerosol WSON. For instance, in situ observations in the subtropical North Atlantic found that aerosol WSON had strong positive relationships with surface ocean primary productivity and wind speed (Altieri et al., 2016). Another study in the South Atlantic Ocean showed that the WSON in marine aerosol associated with high SSW chlorophyll-*a* was 9 times higher than that associated with low SSW chlorophyll-*a* (Violaki et al., 2015). In our observations, the WSON in the background aerosol (black bar in Fig. 3c) was significantly higher in spring than in summer (blue bar in Fig. 3c), which is consistent with the higher SSW chlorophyll-*a* concentration over the NWPO in spring relative to that in summer (Fig. S6). However, the sources of marine aerosol WSON are complex mixture which composed of primary marine organic N and secondary N-containing organic aerosol. Biogenic organic material in SSW can be injected into the atmosphere to form an ice cloud via bubble bursting at the atmosphere-ocean interface (Wilson et al., 2015), this is probably the primary WSON



aerosol source. Volatile organic compounds emitted from the surface ocean can react with  $\text{NO}_x$  and  $\text{NH}_x$  in the atmosphere to form secondary N-containing organic aerosol (Fischer et al., 2014; Liu et al., 2015).

### 3.2 Isotopic composition of nitrogen species

Aerosol  $\delta^{15}\text{N}\text{-NO}_3^-$  values over the ECSs and NWPO in 2014 and 2015 ranged from  $-9.2$  to  $+10.2\text{‰}$  (Table 2 and Fig. 4a and 4b). All the observed  $\delta^{15}\text{N}\text{-NO}_3^-$  values fell within the ranges previously reported for atmospheric  $\delta^{15}\text{N}\text{-NO}_3^-$  over land (Elliott et al., 2009; Fang et al., 2011; Felix and Elliott, 2014) and in the marine boundary layer (Altieri et al., 2013; Gobel et al., 2013; Hastings et al., 2003; Morin et al., 2009; Savarino et al., 2013). The mass-weighted mean aerosol  $\delta^{15}\text{N}\text{-NO}_3^-$  values in 2014 ( $+1.6\text{‰}$  in the ECSs,  $-1.1\text{‰}$  for dust aerosol and  $-2.6\text{‰}$  for background aerosol sampled in the NWPO) were similar to those in 2015 ( $+1.9\text{‰}$  in the ECSs,  $-3.8\text{‰}$  for dust aerosol and  $-1.1\text{‰}$  for background aerosol sampled in the NWPO; Table 2) for all the aerosols, suggesting that the aerosol  $\text{NO}_3^-$  arose from similar origins and atmospheric chemical pathways in both 2014 and 2015.

The  $\delta^{15}\text{N}\text{-WSTN}$  values for all the aerosols ranged from  $-10.7$  to  $+5.6\text{‰}$  (Table 2, Fig 4c and 4d), which is consistent with the  $\delta^{15}\text{N}\text{-WSTN}$  ranges reported in precipitation, which include  $-4.2$  to  $+12.3\text{‰}$  in the Baltic Sea (Rolff et al., 2008);  $-8$  to  $+8\text{‰}$  in Bermuda (Knapp et al., 2010);  $-4.9$  to  $+3.2\text{‰}$  in a forest in southern China (Koba et al., 2012); and  $-12.1$  to  $+2.9\text{‰}$  in Cheju, Korea (Lee et al., 2012). In contrast, our results were lower than the  $\delta^{15}\text{N}\text{-WSTN}$  in TSP sampled in Sapporo, Japan ( $+12.2$  to  $+39.1\text{‰}$ ; Pavuluri et al., 2015) and the Sapporo Forest ( $+9.0$  to  $+26.0\text{‰}$ ; Miyazaki et al., 2014). These authors attributed higher isotopic values to biogenic sources, nitrogenous aerosol aging, and fossil fuel combustion. However, WSTN is, in fact, composed of various nitrogen species, and the relative proportions of  $\text{NH}_4^+$ ,  $\text{NO}_3^-$  and WSON to WSTN, coupled with their isotopic compositions (i.e.  $\delta^{15}\text{N}\text{-NH}_4^+$ ,  $\delta^{15}\text{N}\text{-NO}_3^-$  and  $\delta^{15}\text{N}\text{-WSON}$ ), jointly mediate variations in aerosol  $\delta^{15}\text{N}\text{-WSTN}$  (where  $\delta^{15}\text{N}\text{-WSTN} \cdot [\text{WSTN}] = \delta^{15}\text{N}\text{-NO}_3^- \cdot [\text{NO}_3^-] + \delta^{15}\text{N}\text{-NH}_4^+ \cdot [\text{NH}_4^+] + \delta^{15}\text{N}\text{-WSON} \cdot [\text{WSON}]$ ). Taking our study as an example, the inconsistent trends in both the positive relationships between  $\delta^{15}\text{N}\text{-WSTN}$  and  $\delta^{15}\text{N}\text{-NO}_3^-$  in the ECSs aerosols and NWPO background aerosols (Fig. S7 a and c) and the negative relationship between  $\delta^{15}\text{N}\text{-WSTN}$  and the  $\text{NO}_3^-$  concentration (Fig. S7 d and f) imply that the  $\delta^{15}\text{N}$  of other species ( $\text{NH}_4^+$  and WSON) in WSTN affected the  $\delta^{15}\text{N}\text{-WSTN}$ .

The  $\delta^{15}\text{N}\text{-WSTN}$  values in 2014 ( $-10.7$  to  $+1.0\text{‰}$ ) were lower than those in 2015 ( $-5.6$  to  $+5.6\text{‰}$ ; Table 2), whereas the  $\text{NH}_4^+/\text{WSTN}$  ratios were higher in 2014 than in 2015 (Table 1) for all aerosol types. The negative linear relationships between  $\text{NH}_4^+/\text{WSTN}$  and  $\delta^{15}\text{N}\text{-WSTN}$  for all aerosol types (Fig. 5a, 5b, and 5c) may be attributed to higher proportions of  $\text{NH}_4^+$  in WSTN and negative  $\delta^{15}\text{N}\text{-NH}_4^+$  values, which sourced from the anthropogenic and marine emissions (Altieri et al., 2014; Jickells, 2003; Koba et al., 2012; Liu et al., 2014; Xiao et al., 2012; Yeatman et al., 2001). In fact, low  $\delta^{15}\text{N}\text{-NH}_4^+$  values have been reported in precipitation collected from many places, such as Beijing ( $-33.0$  to  $+14.0\text{‰}$  with an arithmetic mean of  $-10.8\text{‰}$ ; Liu et al., 2014); Guiyang City in southwestern China ( $-38.0$  to  $+5.0\text{‰}$  with an average of  $-15.9\text{‰}$ ; Xiao et al., 2012); Gwangju, Korea ( $-15.9$  to  $+2.9\text{‰}$  with volume-weighted means of  $-6.0\text{‰}$  in 2007 and  $-6.8\text{‰}$  in 2008; Lee et al., 2012); and

a forest in southern China ( $-18.0$  to  $+0.0\text{‰}$  with a concentration-weighted mean of  $-7.7\text{‰}$ ; Koba et al., 2012). Low atmospheric  $\delta^{15}\text{N-NH}_4^+$  has also been associated with marine air masses (e.g.  $-8$  to  $-5\text{‰}$ , Jickells et al. 2003;  $-9 \pm 8\text{‰}$ , Yeatman et al., 2001; and  $-4.1 \pm 2.6\text{‰}$ , Altieri et al., 2014). Together, this low atmospheric average  $\delta^{15}\text{N-NH}_4^+$  ( $-15.9$  to  $-4.1\text{‰}$ ) supports our findings of higher  $\text{NH}_4^+/\text{WSON}$  and lower  $\delta^{15}\text{N-WSTN}$  in aerosol.

There were positive linear relationships between the WSON/WSTN ratio and  $\delta^{15}\text{N-WSTN}$  for all the aerosols types (Fig. 5d, 5e, and 5f). This implies that the aerosol  $\delta^{15}\text{N-WSON}$  may be positive. The WSON in the marine aerosol either originated from terrestrial long-range transport or the DON from SSW and N-containing secondary organic marine aerosol as discussed in Section 3.1. Terrestrial aerosol  $\delta^{15}\text{N-WSON}$  was reported in a wide range ( $-15.0$  to  $+14.7\text{‰}$ ) with mean values from  $-3.7$  to  $+5.0\text{‰}$ , and  $\delta^{15}\text{N-WSON}$  in marine aerosol with more positive  $\delta^{15}\text{N}$  (Fig. S1). In addition, our own observations for  $\delta^{15}\text{N-DON}$  in SSW (sampled at 5 m depth) showed positive  $\delta^{15}\text{N}$  in the ECSs (varying from  $+5.1$  to  $+12.9\text{‰}$ , with an average  $+7.9 \pm 2.3\text{‰}$ ) and NWPO (ranging from  $+1.9$  to  $+11.6\text{‰}$ , with an average  $+5.7 \pm 2.0\text{‰}$ ; Fig. 6a). At the same time, concentrations of DON in our observations ranged from  $4.4$  to  $11.8 \mu\text{mol L}^{-1}$  (Fig. 6b), which is within the DON concentration range reported in global SSW (Knapp et al., 2011; Letscher et al., 2013; Li et al., 2009; L  nborg et al., 2015; Van Engeland et al., 2010). This high DON concentration in SSW may be ejected into the atmosphere during bubble bursting (Wilson et al., 2015).

To better clarify the sources of aerosol WSON, we removed the aerosol  $\text{NO}_3^-$  and its  $\delta^{15}\text{N}$  effect from the WSTN and its  $\delta^{15}\text{N-WSTN}$ , respectively, by mass balance. The remaining  $\text{NH}_4^+$  and WSON was defined as reduced nitrogen ( $\text{RN} = \text{NH}_4^+ + \text{WSON}$ ). The  $\delta^{15}\text{N-RN}$  ranged from  $-11.8$  to  $+7.4\text{‰}$  for all aerosol types in both 2014 and 2015 (Table 2), which is consistent with the reported  $\delta^{15}\text{N-RN}$  in precipitation ( $-12.6$  to  $+7.8\text{‰}$ ) collected in Bermuda, in the Atlantic Ocean (Knapp et al., 2010). The negative relationships between  $\delta^{15}\text{N-RN}$  and  $\text{NH}_4^+$  concentration (Fig. S8 a, b, and c), and between  $\delta^{15}\text{N-RN}$  and the ratios of  $\text{NH}_4^+/\text{RN}$  (Fig. S8 d, e, and f) for all aerosol types further support the low values of  $\delta^{15}\text{N-NH}_4^+$  in marine aerosol. Three important end members, compiled atmospheric  $\delta^{15}\text{N-NH}_4^+$  ( $-15.9$  to  $-4.1\text{‰}$ , green bars in Fig. 7) and continental  $\delta^{15}\text{N-WSON}$  ( $-3.7$  to  $+5.0\text{‰}$ , grey bars) versus the  $\delta^{15}\text{N-DON}$  observed in SSW in our cruise ( $+7.9 \pm 2.3\text{‰}$  in the ECSs and  $+5.7 \pm 2.0\text{‰}$  in the NWPO, red dots with error bars), were added to Figure 7 to facilitate discussion. Note that nearly all the aerosol  $\delta^{15}\text{N-RN}$  values in 2014 were lower than those in 2015, which may be attributed to higher  $\text{NH}_4^+$  concentrations in 2014 than in 2015 (Table 1). Moreover, higher values of  $\delta^{15}\text{N-RN}$  can be seen with higher WSON/RN ratios for all aerosol types in Fig. 7. The high values of  $\delta^{15}\text{N}$  in continental WSON and marine DON in SSW may cause these positive relationships. Thus, although higher WSON/RN values accompany with higher  $\delta^{15}\text{N-RN}$ , we may still not conclude a significant DON in surface sea water contribution to aerosol WSON. In the open ocean, to some extent, background aerosol WSON was more likely influenced by DON in surface sea water judging by nitrogen isotopic information.

Note that some data points collected in 2015 for the open ocean case in Fig. 7b and 7c fell outside the mixing field, deviating toward higher  $\delta^{15}\text{N-RN}$  values; these high  $\delta^{15}\text{N-RN}$  values may be attributable to  $\delta^{15}\text{N}$  fractionation and  $^{15}\text{N}$  enrichment in the WSON during processes such as secondary N-containing organic aerosol formation by the reaction of  $\text{NH}_x$

or  $\text{NO}_x$  with organic aerosol (Fischer et al., 2014; Liu et al., 2015), complex atmospheric chemical reactions (i.e. the photolysis of organic nitrogen into ammonium; Paulot et al., 2015), aerosol WSON aging process, and in-cloud scavenging (Altieri et al., 2016). More studies are needed to explore nitrogen transformation processes, especially those focusing on secondary N-containing organic aerosol in the atmosphere from an isotopic perspective.

### 3.3 Dry Nr deposition and its biogeochemical role

The dry deposition of aerosol  $\text{NH}_4^+$ ,  $\text{NO}_3^-$  and WSON is summarized in Table 3. The calculated depositional fluxes of water-soluble nitrogen species in the ECSs were significantly higher than those in the NWPO (Fig. 8). The averaged dry depositional fluxes of  $\text{NH}_4^+$  and  $\text{NO}_3^-$  in 2014 were 2 to 5 times higher than those in 2015 for all aerosol types (Table 3). The dry depositional fluxes of  $\text{NH}_4^+$  and  $\text{NO}_3^-$  in dust aerosol were clearly higher than those in background aerosol in the NWPO (Table 3, Fig. 8a, 8b, 8c and 8d). Comparisons of these dry fluxes with other similar studies and estimations of the contribution of atmospheric Nr deposition to primary production in the NWPO are discussed in Luo et al. (2016), specifically for 2014; here, we focus on the influence of atmospheric Nr deposition on the nitrogen cycle in the ocean.

The influences of atmospheric Nr deposition on the marine nitrogen cycle are obvious over long time scales. For example, by analysing concentrations of  $\text{NO}_3^-$  and phosphorus in sea water over the NWPO from 1980 to 2010, Kim et al. (2010) reported that the higher N/P ratio in the upper ocean (in contrast to the deep ocean) in the NWPO was caused primarily by the accumulation of atmospheric anthropogenic Nr deposition. Another recent study found higher atmospheric anthropogenic Nr deposition to be associated with lower  $\delta^{15}\text{N}$  in surface sediment over the NWPO (Kim et al., 2017), the authors also posited that atmospheric anthropogenic Nr deposition can reach as far down as the deep ocean through biological action and lower the  $\delta^{15}\text{N}$  in surface sediment. The atmospheric  $\delta^{15}\text{N}$  values for water-soluble nitrogen species in our observations (Table 2) are clearly lower than the  $\delta^{15}\text{N}\text{-NO}_3^-$  in deep ocean water (+5.6‰; unpublished data from Kao); thus, it is possible that atmospheric  $\delta^{15}\text{N}\text{-Nr}$  to lower  $\delta^{15}\text{N}\text{-NO}_3^-$  in the thermocline as mentioned in previous studies (Knapp et al., 2010; Yang et al., 2014). However, it is hard to quantify the contribution of atmospheric  $\delta^{15}\text{N}\text{-Nr}$  to  $\delta^{15}\text{N}\text{-NO}_3^-$  in the thermocline from the perspective of  $^{15}\text{N}$  for the follow reasons. First, there are large spatial and temporal uncertainties in the dry and wet deposition fluxes of atmospheric Nr. For example, the dry depositional fluxes of  $\text{NH}_4^+$  and  $\text{NO}_3^-$  (23.1 to 43.3  $\mu\text{mol N m}^{-2} \text{d}^{-1}$ ; Table 3) in our observations are significantly higher than those in summer (4.9  $\mu\text{mol N m}^{-2} \text{d}^{-1}$ ; Jung et al. 2013). Moreover, according to a previous study, wet Nr deposition is 2 to 3 times higher than dry deposition (Jung et al., 2013), but Nr wet deposition in spring over the NWPO is unknown. Second, the  $\delta^{15}\text{N}$  of N-fixation (−2 to 0‰; summarized by Knapp et al., 2010) is similar to the atmospheric  $\delta^{15}\text{N}\text{-Nr}$  (Table 2), but the fluxes of N-fixation in the global ocean also vary considerably both spatially and temporally (Mulholland and Bernhardt, 2005; Needoba et al., 2007; Karl et al., 1997). Third,  $^{15}\text{N}$  fractionation always occurs in the complicated marine nitrogen cycle (Knapp et al., 2005, 2010, 2011, 2012), which hampers the use of  $^{15}\text{N}$  in estimating the influence of atmospheric deposition Nr on marine  $\delta^{15}\text{N}$  under our limited current understanding.

## 4 Conclusions

Concentrations of water-soluble total nitrogen (WSTN), nitrate ( $\text{NO}_3^-$ ) and ammonium ( $\text{NH}_4^+$ ), as well as the stable nitrogen isotopes of  $\delta^{15}\text{N}$ -WSTN and  $\delta^{15}\text{N}$ - $\text{NO}_3^-$ , were measured in marine aerosols sampled between the ECSs and the NWPO in spring 2014 and 2015. Dissolve organic nitrogen (DON) and  $\delta^{15}\text{N}$ -DON were also analysed in SSW collected at a depth of 5 m along the cruise route in the spring of 2015. The highest concentrations of water-soluble nitrogen species were found in aerosol sampled in the ECSs, which suggests significant influence from anthropogenic emissions on aerosol Nr. The higher  $\text{NO}_3^-$  and  $\text{NH}_4^+$  in all aerosol types in 2014 (relative to 2015) may be attributed to the stronger Asian winter monsoon in 2014, as well as the intensity of residential heating in spring in northern China.

Negative linear relationships were found between the  $\text{NH}_4^+/\text{WSTN}$  ratios and  $\delta^{15}\text{N}$ -WSTN for all aerosol types. In contrast, positive linear relationships were observed between the WSON/WSTN ratios and  $\delta^{15}\text{N}$ -WSTN. The distinctive nitrogen species compositions and isotopic compositions suggest that aerosol  $\delta^{15}\text{N}$ -WSTN values were mediated synergistically by  $\text{NO}_3^-$ ,  $\text{NH}_4^+$ , and WSON in our observations. Meanwhile, our isotope mixing model indicates that DON in SSW is likely to be a source of primary WSON in aerosol, especially over the open ocean. Many uncertainties remain concerning Nr in the marine boundary layer and surface sea water, let alone Nr exchange at the atmosphere-ocean interface; further study of Nr exchange between the low atmosphere and the upper ocean is needed in the future.

*Acknowledgements.* This research was funded by the National Natural Science Foundation of China (NSFC U1305233), Major State Basic Research Development Program of China (973 program) (NO.2014CB953702 and 2015CB954003), National Natural Science Foundation Committee and Hong Kong Research Grants Council Joint Foundation (NSFC-RGC 41561164019), National Natural Science Foundation of China (NSFC 41763001), Doctoral Scientific Research Foundation of East China University of Technology (NO. DHBK2016105), Science and technology project of the Jiangxi Provincial Department of Education (NO. GJJ160580), and Scientific Research Foundation of the East China University of Technology for the Science and Technology Innovation Team (NO. DHKT2015101). The MEL (State Key Laboratory of Marine Environmental Science) publication number for this manuscript is #2017209.

## References:

- Adornato, L. R., Kaltenbacher, E. A., Villareal, T. A., and Byrne, R. H.: Continuous in situ determinations of nitrite at nanomolar concentrations, Deep Sea Research Part I: Oceanographic Research Papers, 52, 543-551, doi:10.1016/j.dsr.2004.11.008, 2005.
- Altieri, K. E., Fawcett, S. E., Peters, A. J., Sigman, D. M., and Hastings, M. G.: Marine biogenic source of atmospheric organic

- nitrogen in the subtropical North Atlantic, *Proceedings of the National Academy of Sciences of the United States of America*, 113, 925-930, doi:10.1073/pnas.1516847113, 2016.
- Altieri, K. E., Hastings, M. G., Gobel, A. R., Peters, A. J., and Sigman, D. M.: Isotopic composition of rainwater nitrate at Bermuda: The influence of air mass source and chemistry in the marine boundary layer, *Journal of Geophysical Research: Atmospheres*, 118, 304-311, doi:10.1002/jgrd.50829, 2013.
- Altieri, K. E., Hastings, M. G., Peters, A. J., Oleynik, S., and Sigman, D. M.: Isotopic evidence for a marine ammonium source in rainwater at Bermuda, *Global Biogeochemical Cycles*, 28, 1066-1080, doi:10.1002/2014gb004809, 2014.
- Archana, A., Luo L., Kao S.J., Thibodeau, B., and Baker, D. M.: Variations in nitrate isotope composition of wastewater effluents by treatment type in Hong Kong, *Marine pollution bulletin*, 111, 143-152, 2016.
- Böhlke, J., Mroczkowski, S., and Coplen, T.: Oxygen isotopes in nitrate: New reference materials for 18O: 17O: 16O measurements and observations on nitrate-water equilibration, *Rapid Communications in Mass Spectrometry*, 17, 1835-1846, 2003.
- Braman, R. S., and Hendrix, S. A.: Nanogram nitrite and nitrate determination in environmental and biological materials by vanadium (III) reduction with chemiluminescence detection, *Analytical Chemistry*, 61, 2715-2718, 1989.
- Buffam, I., and McGlathery, K. J.: Effect of ultraviolet light on dissolved nitrogen transformations in coastal lagoon water, *Limnology and oceanography*, 48, 723-734, 2003.
- Cape, J. N., Cornell, S. E., Jickells, T. D., and Nemitz, E.: Organic nitrogen in the atmosphere — Where does it come from? A review of sources and methods, *Atmospheric Research*, 102, 30-48, doi:10.1016/j.atmosres.2011.07.009, 2011.
- Casciotti, K., Sigman, D., Hastings, M. G., Böhlke, J., and Hilkert, A.: Measurement of the oxygen isotopic composition of nitrate in seawater and freshwater using the denitrifier method, *Analytical Chemistry*, 74, 4905-4912, 2002.
- Cornell, S., Randell, A., and Jickells, T.: Atmospheric inputs of dissolved organic nitrogen to the oceans, *Nature*, 376, 243-246, 1995.
- De Haan, D. O., Hawkins, L. N., Kononenko, J. A., Turley, J. J., Corrigan, A. L., Tolbert, M. A., and Jimenez, J. L.: Formation of nitrogen-containing oligomers by methylglyoxal and amines in simulated evaporating cloud droplets, *Environmental science & technology*, 45, 984-991, 2010.
- Doney, S. C.: The growing human footprint on coastal and open-ocean biogeochemistry, *Science*, 328(5985):1512-1516, 2010.
- Dorman, C. E., Bourke, R. H.: Precipitation over the Pacific Ocean, 30 °S to 60 °N. *Monthly Weather Review*, 1979, 107(7). doi: 10.1175/1520-0493(1979)107<0896:POTPOT>2.0.CO;2
- Duce, R., LaRoche, J., Altieri, K., Arrigo, K. R., Baker, A. R., Capone, D. G., Cornell, S., Dentener, F., Galloway, J., Ganeshram, R. S., Geider, R. J., Jickells, T., Kuypers, M. M., Langlois, R., Liss, P. S., Liu, S. M., Middelburg, J. J., Moore, C. M., Nickovic, S., Oschlies, A., Pedersen, T., Prospero, J., Schlitzer, R., Seitzinger, S., Sorensen, L. L., Uematsu, M., Ulloa, O., Voss, M., Ward, B., and Zamora, L.: Impacts of atmospheric anthropogenic nitrogen on the open ocean, *Science*,

- 320, 893-897, doi:10.1126/science.1150369, 2008.
- Duce, R., Unni, C., Ray, B., Prospero, J., and Merrill, J.: Long-range atmospheric transport of soil dust from Asia to the tropical North Pacific: temporal variability, *Science*, 209, 1522–1524, 1980.
- Elliott, E. M., Kendall, C., Boyer, E. W., Burns, D. A., Lear, G. G., Golden, H. E., Harlin, K., Bytnerowicz, A., Butler, T. J., and Glatz, R.: Dual nitrate isotopes in dry deposition: Utility for partitioning NO<sub>x</sub> source contributions to landscape nitrogen deposition, *Journal of Geophysical Research*, 114, doi:10.1029/2008jg000889, 2009.
- Erismann, J. W., Hensen, A., de Vries, W., Kros, H., van de Wal, T., de Winter, W., Wien, J., van Elswijk, M., and Maat, M.: The nitrogen decision support system: NitroGenius, Energy research Centre of the Netherlands ECN, 2002.
- Fang, Y. T., Koba, K., Wang, X. M., Wen, D. Z., Li, J., Takebayashi, Y., Liu, X. Y., and Yoh, M.: Anthropogenic imprints on nitrogen and oxygen isotopic composition of precipitation nitrate in a nitrogen-polluted city in southern China, *Atmospheric Chemistry and Physics*, 11, 1313-1325, doi:10.5194/acp-11-1313-2011, 2011.
- Felix, J. D., Elliott, E. M., and Shaw, S. L.: Nitrogen isotopic composition of coal-fired power plant NO<sub>x</sub>: influence of emission controls and implications for global emission inventories, *Environmental science & technology*, 46, 3528-3535, doi:10.1021/es203355v, 2012.
- Felix, J. D., and Elliott, E. M.: Isotopic composition of passively collected nitrogen dioxide emissions: Vehicle, soil and livestock source signatures, *Atmospheric Environment*, 92, 359-366, 2014.
- Fischer, E. V., Jacob, D. J., Yantosca, R. M., Sulprizio, M. P., Millet, D. B., Mao, J., Paulot, F., Singh, H. B., Roiger, A., Ries, L., Talbot, R. W., Dzepina, K., and Pandey Deolal, S.: Atmospheric peroxyacetyl nitrate (PAN): a global budget and source attribution, *Atmospheric Chemistry and Physics*, 14, 2679-2698, doi:10.5194/acp-14-2679-2014, 2014.
- Freyer, H.: Seasonal trends of NH<sub>4</sub><sup>+</sup> and NO<sub>3</sub><sup>-</sup> nitrogen isotope composition in rain collected at Jülich, Germany, *Tellus A*, 30, 83-92, doi: 10.1111/j.2153-3490.1978.tb00820.x, 1978.
- Ge, X., Wexler, A. S., Clegg, S. L. Atmospheric amines – Part I. A review. *Atmospheric Environment*, 2011, 45(3):524-546.
- Gobel, A. R., Altieri, K. E., Peters, A. J., Hastings, M. G., and Sigman, D. M.: Insights into anthropogenic nitrogen deposition to the North Atlantic investigated using the isotopic composition of aerosol and rainwater nitrate, *Geophysical Research Letters*, 40, 5977-5982, 2013.
- Gu, B., Ge, Y., Ren, Y., Xu, B., Luo, W., Jiang, H., Gu, B., and Chang J.: Atmospheric reactive nitrogen in China: sources, recent trends, and damage costs. *Environmental Science & Technology*, 46(17), 9420-9427, 2012.
- Hastings, M. G., Sigman, D. M., and Lipschultz, F.: Isotopic evidence for source changes of nitrate in rain at Bermuda, *Journal of Geophysical Research: Atmospheres*, 108, doi:10.1029/2003JD 003789, 2003.
- Heaton, T. H. E.: <sup>15</sup>N/<sup>14</sup>N ratios of nitrate and ammonium in rain at Pretoria, South Africa, *Atmospheric Environment*, 21, 843-852, 1987.
- Hoque, M., Kawamura, K., Seki, O., and Hoshi, N.: Spatial distributions of dicarboxylic acids, ω-oxoacids, pyruvic acid and

- $\alpha$ -dicarbonyls in the remote marine aerosols over the North Pacific, *Marine Chemistry*, 172, 1-11, doi:10.1016/j.marchem.2015.03.003, 2015.
- Hsu, S. C., Lee, C. S. L., Huh, C. A., Shaheen, R., Lin, F. J., Liu, S. C., Liang, M. C., and Tao, J.: Ammonium deficiency caused by heterogeneous reactions during a super Asian dust episode, *Journal of Geophysical Research: Atmospheres*, 119, 6803-6817, 2014.
- Jickells T D, Kelly S D, Baker A R, et al. Isotopic evidence for a marine ammonia source. *Geophysical Research Letters*, 30(7):359-376, 2003.
- Jung, J., Furutani, H., Uematsu, M., Kim, S., and Yoon, S.: Atmospheric inorganic nitrogen input via dry, wet, and sea fog deposition to the subarctic western North Pacific Ocean, *Atmos. Chem. Phys.*, 13, 411-428, doi:10.5194/acp-13-411-2013, 2013.
- Kanakidou, M., Duce, R. A., Prospero, J. M., Baker, A. R., Benitez-Nelson, C., and Dentener, F. J.: Atmospheric fluxes of organic N and P to the global ocean. *Global Biogeochemical Cycles*, 26, GB3026, doi:10.1029/2011GB004277, 2012.
- Kang, C.-H., Kim, W.-H., Ko, H.-J., and Hong, S.-B.: Asian dust effects on total suspended particulate (TSP) compositions at Gosanin Jeju Island, Korea, *Atmos. Res.*, 94, 345-355, 2009.
- Karl, D., Letelier, R., Tupas, L., Dore, J., Christian, J., and Hebel, D.: The role of nitrogen fixation in biogeochemical cycling in the subtropical North Pacific Ocean, *Nature*, 388, 533-538, 1997.
- Kelly, S. D., Stein, C., and Jickells, T. D.: Carbon and nitrogen isotopic analysis of atmospheric organic matter, *Atmospheric Environment*, 39, 6007-6011, doi:10.1016/j.atmosenv.2005.05.030, 2005.
- Kim, T. W., Lee, K., Najjar, R. G., Jeong, H. D., and Jeong, H. J.: Increasing N abundance in the northwestern Pacific Ocean due to atmospheric nitrogen deposition, *Science*, 334, 505-509, doi:10.1126/science.1206583, 2011.
- Knapp, A. N., Sigman, D. M., and Lipschultz, F.: N isotopic composition of dissolved organic nitrogen and nitrate at the Bermuda Atlantic Time-series Study site, *Global Biogeochemical Cycles*, 19, doi:10.1029/2004GB002320, 2005.
- Knapp, A. N., Hastings, M. G., Sigman, D. M., Lipschultz, F., and Galloway, J. N.: The flux and isotopic composition of reduced and total nitrogen in Bermuda rain, *Marine Chemistry*, 120, 83-89, doi:10.1016/j.marchem.2008.08.007, 2010.
- Knapp, A. N., Sigman, D. M., Lipschultz, F., Kustka, A. B., and Capone, D. G.: Interbasin isotopic correspondence between upper-ocean bulk DON and subsurface nitrate and its implications for marine nitrogen cycling, *Global Biogeochemical Cycles*, 25, doi:10.1029/2010GB003878, 2011.
- Knapp, A. N., Sigman, D. M., Kustka, A. B., Sañudo-Wilhelmy, S. A., and Capone, D. G.: The distinct nitrogen isotopic compositions of low and high molecular weight marine DON, *Marine Chemistry*, 136, 24-33, 2012.
- Koba, K., Fang, Y., Mo, J., Zhang, W., Lu, X., Liu, L., Zhang, T., Takebayashi, Y., Toyoda, S., Yoshida, N., Suzuki, K., Yoh, M., and Senoo, K.: The  $^{15}\text{N}$  natural abundance of the N lost from an N-saturated subtropical forest in southern China, *Journal of Geophysical Research: Biogeosciences*, 117, doi:10.1029/2010jg001615, 2012.

- Kunwar, B., and Kawamura, K.: One-year observations of carbonaceous and nitrogenous components and major ions in the aerosols from subtropical Okinawa Island, an outflow region of Asian dusts, *Atmospheric Chemistry and Physics*, 14, 1819-1836, doi:10.5194/acp-14-1819-2014, 2014.
- Lønborg, C., Yokokawa, T., Herndl, G. J., and Álvarez-Salgado, X. A.: Production and degradation of fluorescent dissolved organic matter in surface waters of the eastern north Atlantic ocean, *Deep Sea Research Part I: Oceanographic Research Papers*, 96, 28-37, 2015.
- Lee, K.-S., Lee, D.-S., Lim, S.-S., Kwak, J.-H., Jeon, B.-J., Lee, S.-I., Lee, S.-M., and Choi, W.-J.: Nitrogen isotope ratios of dissolved organic nitrogen in wet precipitation in a metropolis surrounded by agricultural areas in southern Korea, *Agriculture, Ecosystems & Environment*, 159, 161-169, doi:10.1016/j.agee.2012.07.010, 2012.
- Lesworth, T., Baker, A. R., and Jickells, T.: Aerosol organic nitrogen over the remote Atlantic Ocean, *Atmospheric Environment*, 44, 1887-1893, 10.1016/j.atmosenv.2010.02.021, 2010.
- Letscher, R. T., Hansell, D. A., Carlson, C. A., Lumpkin, R., and Knapp, A. N.: Dissolved organic nitrogen in the global surface ocean: Distribution and fate, *Global Biogeochemical Cycles*, 27, 141-153, 2013.
- Li, J., Glibert, P. M., Zhou, M., Lu, S., and Lu, D.: Relationships between nitrogen and phosphorus forms and ratios and the development of dinoflagellate blooms in the East China Sea, *Marine Ecology Progress Series*, 383, 11-26, doi:10.3354/meps07975, 2009.
- Liu, D., Fang, Y., Tu, Y., and Pan, Y.: Chemical method for nitrogen isotopic analysis of ammonium at natural abundance, *Anal Chem*, 86, 3787-3792, doi:10.1021/ac403756u, 2014.
- Liu Y, Liggio J, Staebler R, et al. Reactive uptake of ammonia to secondary organic aerosols: kinetics of organonitrogen formation, *Atmospheric Chemistry & Physics*, 2015, 15(23):17449-17490.
- Luo, L., Yao, X. H., Gao, H. W., Hsu, S. C., Li, J. W., and Kao, S. J.: Nitrogen speciation in various types of aerosols in spring over the northwestern Pacific Ocean, *Atmospheric Chemistry and Physics*, 16, 325-341, doi:10.5194/acp-16-325-2016, 2016.
- Mace, K. A., Kubilay, N., and Duce, R. A.: Organic nitrogen in rain and aerosol in the eastern Mediterranean atmosphere: an association with atmospheric dust, *J. Geophys. Res.-Atmos.*, 108, 4320, doi:10.1029/2002JD002997, 2003
- Matsumoto, K., Yamamoto, Y., Kobayashi, H., Kaneyasu, N., and Nakano, T.: Water-soluble organic nitrogen in the ambient aerosols and its contribution to the dry deposition of fixed nitrogen species in Japan, *Atmospheric Environment*, 95, 334-343, doi:10.1016/j.atmosenv.2014.06.037, 2014.
- Miyazaki, Y., Fu, P., Ono, K., Tachibana, E., and Kawamura, K.: Seasonal cycles of water-soluble organic nitrogen aerosols in a deciduous broadleaf forest in northern Japan, *Journal of Geophysical Research: Atmospheres*, 119, 1440-1454, doi:10.1002/2013jd020713, 2014.
- Miyazaki, Y., Kawamura, K., Jung, J., Furutani, H., and Uematsu, M.: Latitudinal distributions of organic nitrogen and organic



- carbon in marine aerosols over the western North Pacific, *Atmospheric Chemistry and Physics* 11, 3037-3049, 2011.
- Montoya, J. P., Holl, C. M., Zehr, J. P., Hansen, A., Villareal, T. A., and Capone, D. G.: High rates of N<sub>2</sub> fixation by unicellular diazotrophs in the oligotrophic Pacific Ocean, *Nature*, 430, 1027-1032, 2004.
- Morin, S., Savarino, J., Frey, M. M., Domine, F., Jacobi, H. W., Kaleschke, L., and Martins, J. M. F.: Comprehensive isotopic composition of atmospheric nitrate in the Atlantic Ocean boundary layer from 65°S to 79°N, *Journal of Geophysical Research*, 114, doi:10.1029/2008jd010696, 2009.
- Mulholland, M. R., and Bernhardt, P. W.: The effect of growth rate, phosphorus concentration, and temperature on N<sub>2</sub> fixation, carbon fixation, and nitrogen release in continuous cultures of *Trichodesmium* IMS101, *Limnol. Oceanogr.*, 50, 839-849, 2005.
- Needoba, J. A., Foster, R. A., Sakamoto, C., Zehr, J. P., and Johnson, K. S.: Nitrogen fixation by unicellular diazotrophic cyanobacteria in the temperate oligotrophic North Pacific Ocean, *Limnology and Oceanography*, 52, 1317-1327, 2007.
- Paulot, F., Jacob, D. J., Johnson, M. T., Bell, T. G., Baker, A. R., Keene, W. C., Lima, I. D., Doney, S. C., and Stock, C. A.: Global oceanic emission of ammonia: Constraints from seawater and atmospheric observations, *Global Biogeochemical Cycles*, 29, 1165-1178, doi:10.1002/2015gb.005106, 2015.
- Pavuluri, C. M., Kawamura, K., and Fu, P. Q.: Atmospheric chemistry of nitrogenous aerosols in northeastern Asia: biological sources and secondary formation, *Atmospheric Chemistry and Physics*, 15, 9883-9896, doi:10.5194/acp-15-9883-2015, 2015.
- Rolff, C., Elmgren, R., and Voss, M.: Deposition of nitrogen and phosphorus on the Baltic Sea: seasonal patterns and nitrogen isotope composition, *Biogeosciences*, 5, 1657-1667, doi:10.5194/bg-5-1657-2008, 2008.
- Russell, K. M., Galloway, J. N., Macko, S. A., Moody, J. L., and Scudlark, J. R.: Sources of nitrogen in wet deposition to the Chesapeake Bay region, *Atmospheric Environment*, 32, 2453-2465, doi:10.1016/S1352-2310(98)00044-2, 1998.
- Savarino, J., Morin, S., Erbland, J., Grannec, F., Patey, M. D., Vicars, W., Alexander, B., and Achterberg, E. P.: Isotopic composition of atmospheric nitrate in a tropical marine boundary layer, *Proceedings of the National Academy of Sciences of the United States of America*, 110, 17668-17673, doi:10.1073/pnas.1216639110, 2013.
- Sigman, D., Casciotti, K., Andreani, M., Barford, C., Galanter, M., and Böhlke, J.: A bacterial method for the nitrogen isotopic analysis of nitrate in seawater and freshwater, *Analytical chemistry*, 73, 4145-4153, doi:10.1021/ac010088e, 2001.
- Sigman, D. M., Granger, J., DiFiore, P. J., Lehmann, M. M., Ho, R., Cane, G., and van Geen, A.: Coupled nitrogen and oxygen isotope measurements of nitrate along the eastern North Pacific margin, *Global Biogeochemical Cycles*, 19, doi:10.1029/2005gb002458, 2005.
- Van Engeland, T., Soetaert, K., Knuijt, A., Laane, R., and Middelburg, J.: Dissolved organic nitrogen dynamics in the North Sea: A time series analysis, *Estuarine, Coastal and Shelf Science*, 89, 31-42, doi:10.1016/j.ecss.2010.05.009, 2010.
- Violaki, K., Sciare, J., Williams, J., Baker, A. R., Martino, M., and Mihalopoulos, N.: Atmospheric water-soluble organic

- nitrogen (WSO<sub>N</sub>) over marine environments: a global perspective, *Biogeosciences*, 12, 3131-3140, doi:10.5194/bg-12-3131-2015, 2015.
- Walters, W. W., Goodwin, S. R., and Michalski, G.: Nitrogen Stable Isotope Composition ( $\delta^{15}\text{N}$ ) of Vehicle Emitted NO<sub>x</sub>, *Environmental science & technology*, 49, 2278-2285, doi:10.1021/es505580v, 2015.
- Wang, B., Clemens, S. C., Liu, P.: Contrasting the Indian and East Asian monsoons: implications on geologic timescales. *Marine Geology*, 201(1-3):5-21, 2003.
- Wang, G. H., Zhou, B. H., Cheng, C. L., Cao, J. J., Li, J. J., Meng, J. J., Tao, J., Zhang, R. J., and Fu, P. Q.: Impact of Gobi desert dust on aerosol chemistry of Xi'an, inland China during spring 2009: differences in composition and size distribution between the urban ground surface and the mountain atmosphere, *Atmospheric Chemistry and Physics*, 13, 819-835, doi:10.5194/acp-13-819-2013, 2013.
- Wilson, T. W., Ladino, L. A., Alpert, P. A., Breckels, M. N., Brooks, I. M., Browse, J., Burrows, S. M., Carslaw, K. S., Huffman, J. A., Judd, C., Kilhau, W. P., Mason, R. H., McFiggans, G., Miller, L. A., Najera, J. J., Polishchuk, E., Rae, S., Schiller, C. L., Si, M., Temprado, J. V., Whale, T. F., Wong, J. P., Wurl, O., Yakobi-Hancock, J. D., Abbatt, J. P., Aller, J. Y., Bertram, A. K., Knopf, D. A., and Murray, B. J.: A marine biogenic source of atmospheric ice-nucleating particles, *Nature*, 525, 234-238, doi:10.1038/nature14986, 2015.
- Wozniak, A. S., Willoughby, A. S., Gurganus, S. C., and Hatcher, P. G.: Distinguishing molecular characteristics of aerosol water soluble organic matter from the 2011 trans-North Atlantic US GEOTRACES cruise. *Atmospheric Chemistry & Physics*, 14(5):8419-8434, 2014.
- Xiao, H-W., Xiao, H-Y., Long, A-M., and Wang, Y.-L.: Who controls the monthly variations of NH<sub>4</sub><sup>+</sup> nitrogen isotope composition in precipitation?, *Atmospheric Environment*, 54, 201-206, doi:10.1016/j.atmosenv.2012.02.035, 2012.
- Xiao, Q., Ma, Z., Li, S., and Liu, Y.: The impact of winter heating on air pollution in China, *PloS one*, 10, doi:10.1371/journal.pone.0117311, 2015.
- Yang, J. Y. T., Hsu, S. C., Dai, M. H., Hsiao, S. S. Y., and Kao, S. J.: Isotopic composition of water-soluble nitrate in bulk atmospheric deposition at Dongsha Island: sources and implications of external N supply to the northern South China Sea, *Biogeosciences*, 11, 1833-1846, doi:10.5194/bg-11-1833-2014, 2014.
- Yang, Y. Q., Wang, J. Z., Niu T., Zhou, C., Chen, M., and Liu, J.: The Variability of Spring Sand-Dust Storm Frequency in Northeast Asia from 1980 to 2011. *Journal of Meteorological Research*, 2013, 27(1):119-127.
- Yeatman, S., Spokes, L., Dennis, P., and Jickells, T.: Comparisons of aerosol nitrogen isotopic composition at two polluted coastal sites, *Atmospheric Environment*, 35, 1307-1320, doi:10.1016 /S1352-2310(00)00408-8, 2001.
- Zhang, R., Jing, J., Tao, J., Hsu, S.-C., Wang, G., Cao, J., Lee, C. S. L., Zhu, L., Chen, Z., Zhao, Y., and Shen, Z.: Chemical characterization and source apportionment of PM<sub>2.5</sub> in Beijing: seasonal perspective, *Atmos. Chem. Phys.*, 13, 7053-7074, doi:10.5194/acp-13-7053-2013, 2013.

Zhang, S.-P., Xie, S.-P., Liu, Q.-Y., Yang, Y.-Q., Wang, X.-G., and Ren, Z.-P.: Seasonal variations of Yellow Sea fog: observations and Mechanisms, *J. Climate*, 22, 6758–6772, doi:10.1175/2009jcli2806.1, 2009.

**Table 1. Concentration ranges and means for WSTN,  $\text{NH}_4^+$ ,  $\text{NO}_3^-$ , WSON and RN in aerosols.**

|                |      | WSTN (nmol m <sup>-3</sup> ) |                   |                   | $\text{NH}_4^+$ (nmol m <sup>-3</sup> ) |                   |                   | $\text{NH}_4^+$ / | $\text{NO}_3^-$ (nmol m <sup>-3</sup> ) |                   |                   | $\text{NO}_3^-$ / | WSON (nmol m <sup>-3</sup> ) |                   |                   | WSON/     | RN (nmol m <sup>-3</sup> ) |                   |                   |
|----------------|------|------------------------------|-------------------|-------------------|-----------------------------------------|-------------------|-------------------|-------------------|-----------------------------------------|-------------------|-------------------|-------------------|------------------------------|-------------------|-------------------|-----------|----------------------------|-------------------|-------------------|
|                |      | Range                        | Mean <sup>a</sup> | Mean <sup>b</sup> | Range                                   | Mean <sup>a</sup> | Mean <sup>b</sup> | WSTN              | Range                                   | Mean <sup>a</sup> | Mean <sup>b</sup> | WSTN              | Range                        | Mean <sup>a</sup> | Mean <sup>b</sup> | WSTN      | Range                      | Mean <sup>a</sup> | Mean <sup>b</sup> |
| ECSs (Sea fog) | 2014 | 444 ~ 2411                   | 1126              | 1136              | 228 ~ 777                               | 442               | 437               | 0.42±0.09         | 160 ~ 1118                              | 536               | 550               | 0.48±0.07         | 23 ~ 517                     | 149               | 148               | 0.10±0.06 | 267 ~ 1294                 | 591               | 585               |
|                | 2015 | 92.9 ~ 1195                  | 321               | 287               | 25.7 ~ 564                              | 126               | 113               | 0.35±0.12         | 30.1 ~ 239                              | 93.2              | 87.6              | 0.35±0.15         | 6.9 ~ 392                    | 102               | 85.7              | 0.29±0.18 | 32.6 ~ 956                 | 228               | 199               |
| NWPO (Dust)    | 2014 | 205 ~ 297                    | 245               | 242               | 94.4 ~ 163                              | 138               | 137               | 0.56±0.07         | 78.6 ~ 145                              | 100               | 98.3              | 0.41±0.05         | 7.7 ~ 16.9                   | 11.2              | 11                | 0.05±0.02 | 111 ~ 173                  | 145               | 144               |
|                | 2015 | 81.4 ~ 340                   | 147               | 154               | 20.7 ~ 143                              | 58.3              | 61.4              | 0.39±0.13         | 34.7 ~ 126                              | 57.2              | 58.6              | 0.41±0.1          | 5.8 ~ 80.7                   | 31.7              | 34.4              | 0.21±0.13 | 45.0 ~ 214                 | 89.9              | 95.8              |
| NWPO (Bgd.)    | 2014 | 31.4 ~ 411                   | 88.8              | 85.6              | 16.1 ~ 244                              | 54                | 51.8              | 0.60±0.11         | 6.4 ~ 166                               | 25.8              | 25.1              | 0.27±0.09         | 0.9 ~ 27.1                   | 10.7              | 9.7               | 0.14±0.08 | 19.2 ~ 245                 | 63.1              | 60.5              |
|                | 2015 | 21.0 ~ 68.7                  | 41.7              | 42.3              | 6.9 ~ 29.5                              | 16.3              | 15.5              | 0.41±0.15         | 2.8 ~ 35.1                              | 12.7              | 13.4              | 0.29±0.13         | 1.0 ~ 40.3                   | 12.7              | 13.4              | 0.30±0.16 | 15.2 ~ 48.2                | 29                | 28.9              |

a, arithmetic mean

b, volume-weighted mean

**Table 2. Ranges and means for stable nitrogen isotopes of WSTN,  $\text{NO}_3^-$  and RN in aerosols.**

|                |      | $\delta^{15}\text{N}$ -WSTN |                   |                   | $\delta^{15}\text{N}$ - $\text{NO}_3^-$ |                   |                   | $\delta^{15}\text{N}$ -RN |                   |                   |
|----------------|------|-----------------------------|-------------------|-------------------|-----------------------------------------|-------------------|-------------------|---------------------------|-------------------|-------------------|
|                |      | Range                       | Mean <sup>a</sup> | Mean <sup>b</sup> | Range                                   | Mean <sup>a</sup> | Mean <sup>b</sup> | Range                     | Mean <sup>a</sup> | Mean <sup>b</sup> |
| ECSs (Sea fog) | 2014 | -5.3 ~ -1.7                 | -3.4              | -3.4              | -1.7 ~ +4.3                             | +1.0              | +1.6              | -11.8 ~ -2.5              | -7.3              | -7.9              |
|                | 2015 | -4.3 ~ +0.9                 | -1.1              | -2.1              | -1.3 ~ +10.2                            | +2.8              | +1.9              | -5.2 ~ -0.6               | -3.3              | -3.7              |
| NWPO (Dust)    | 2014 | -6.9 ~ -3.1                 | -4.7              | -4.4              | -3.0 ~ +1.3                             | -1.0              | -1.1              | -9.4 ~ -5.8               | -7.1              | -7.3              |
|                | 2015 | -3.0 ~ +0.8                 | -1.5              | -1.3              | -7.3 ~ -2.1                             | -3.9              | -3.8              | -2.7 ~ +5.5               | +0.6              | +0.3              |
| NWPO (Bgd.)    | 2014 | -10.7 ~ +1.0                | -5.6              | -5.5              | -7.6 ~ +4.3                             | -2.3              | -2.6              | -11.7 ~ +1.5              | -6.9              | -6.7              |
|                | 2015 | -5.6 ~ +5.6                 | +0.8              | +0.9              | -9.2 ~ +1.2                             | -1.6              | -1.1              | -5.0 ~ +7.4               | +1.9              | +1.7              |

a, arithmetic mean

b, mass-weighted mean

|                |      | NH <sub>4</sub> <sup>+</sup> (μmol N m <sup>-2</sup> d <sup>-1</sup> ) |                   |                   | NO <sub>3</sub> <sup>-</sup> (μmol N m <sup>-2</sup> d <sup>-1</sup> ) |                   |                   | WSON (μmol N m <sup>-2</sup> d <sup>-1</sup> ) |                   |                   |
|----------------|------|------------------------------------------------------------------------|-------------------|-------------------|------------------------------------------------------------------------|-------------------|-------------------|------------------------------------------------|-------------------|-------------------|
|                |      | Range                                                                  | Mean <sup>a</sup> | Mean <sup>b</sup> | Range                                                                  | Mean <sup>a</sup> | Mean <sup>b</sup> | Range                                          | Mean <sup>a</sup> | Mean <sup>b</sup> |
| ECSs (Sea fog) | 2014 | 19.7 ~ 67.2                                                            | 38.1              | 37.8              | 277 ~ 1931                                                             | 926               | 951               | 19.7 ~ 446                                     | 129               | 128               |
|                | 2015 | 2.2 ~ 48.7                                                             | 10.9              | 9.8               | 52.1 ~ 412                                                             | 161               | 151               | 5.9 ~ 339                                      | 88.5              | 74.1              |
| NWPO (Dust)    | 2014 | 8.2 ~ 14.1                                                             | 11.9              | 11.9              | 136 ~ 250                                                              | 172               | 170               | ~ 14.6                                         | 6.5               | 5.5               |
|                | 2015 | 1.8 ~ 12.4                                                             | 5.0               | 5.3               | 60.0 ~ 218                                                             | 98.8              | 101               | 5.0 ~ 69.7                                     | 27.3              | 29.7              |
| NWPO (Bgd.)    | 2014 | 1.4 ~ 21.1                                                             | 4.7               | 4.5               | 11.0 ~ 287                                                             | 44.6              | 43.3              | ~ 23.4                                         | 7.6               | 7.5               |
|                | 2015 | 0.6 ~ 2.6                                                              | 1.4               | 1.3               | 4.9 ~ 60.6                                                             | 21.9              | 23.1              | 0.9 ~ 34.8                                     | 10.9              | 11.6              |

a, arithmetic mean

b, volume-weighted mean

**Table 3. Dry deposition fluxes of water-soluble nitrogen species.**

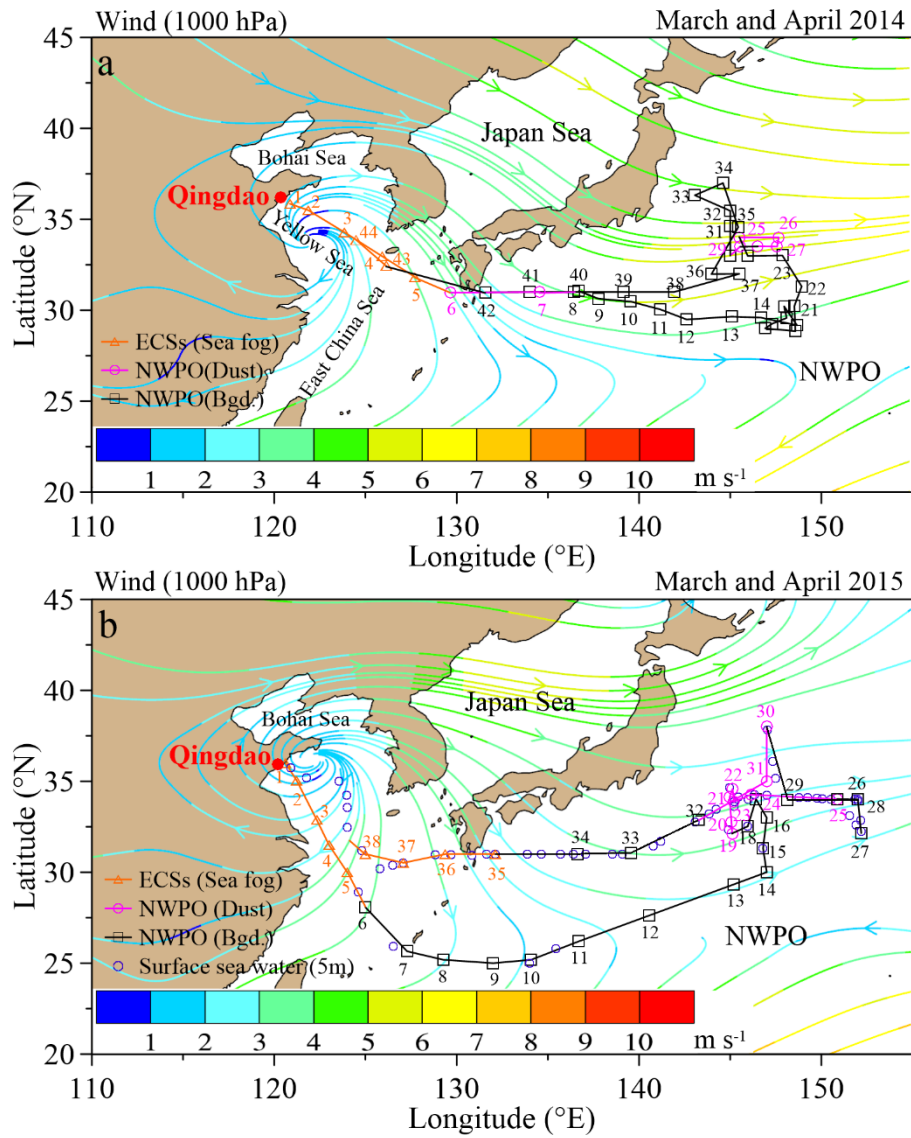

**Figure 1. Regional wind streamlines (in  $\text{m s}^{-1}$ ) at 1000 hPa during the Asian winter monsoon period (a, March and April in 2014 and b, March and April in 2015) based on an NCEP dataset. Cruise tracks are also shown (orange, pink, and black indicate sea fog, dust, and background aerosol, respectively). The aerosol number and collection range are shown in orange, pink, and black for sea-fog modified, dust, and background aerosol, respectively. The blue open circles in (b) indicate the locations of surface sea water sample (at 5 m depth) during the 2015 cruise.**

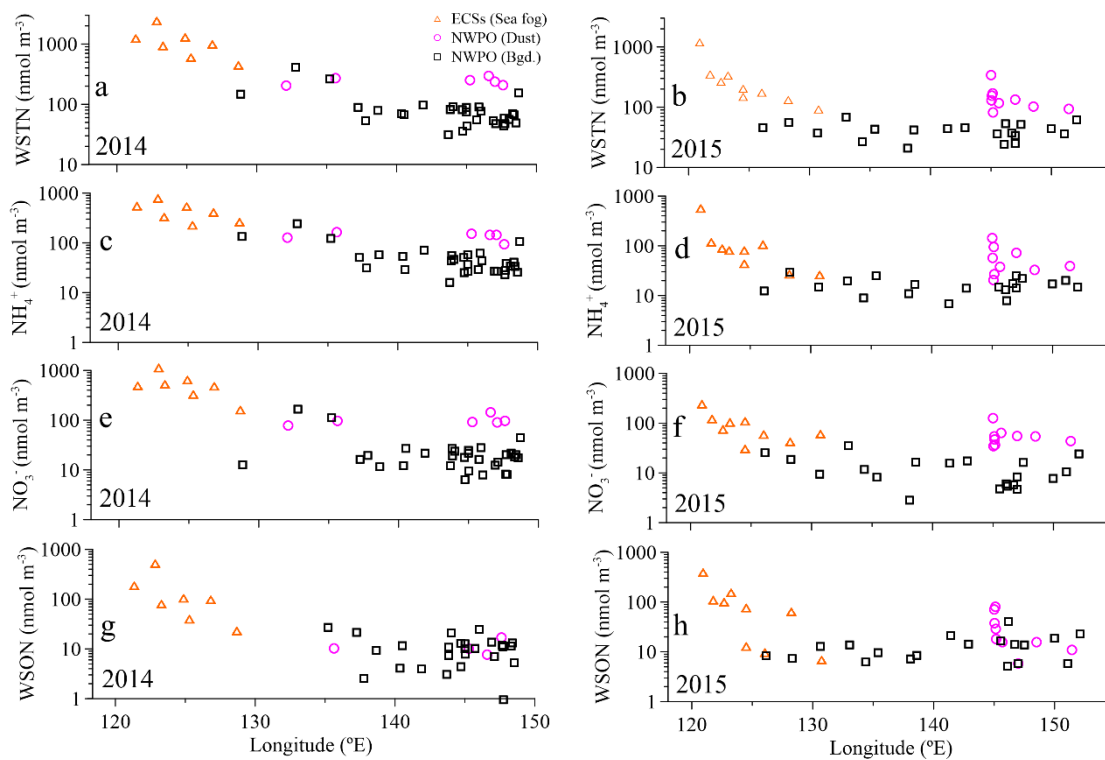

**Figure 2.** Concentrations of aerosol WSTN (a and b),  $\text{NH}_4^+$  (c and d),  $\text{NO}_3^-$  (e and f), and WSON (g and h) with longitude for the 2014 and 2015 cruises. The orange open triangles denote sea-fog-modified aerosol in the ECSs, the pink circles denote dust aerosol, and the black open squares denote background aerosol in the NWPO.



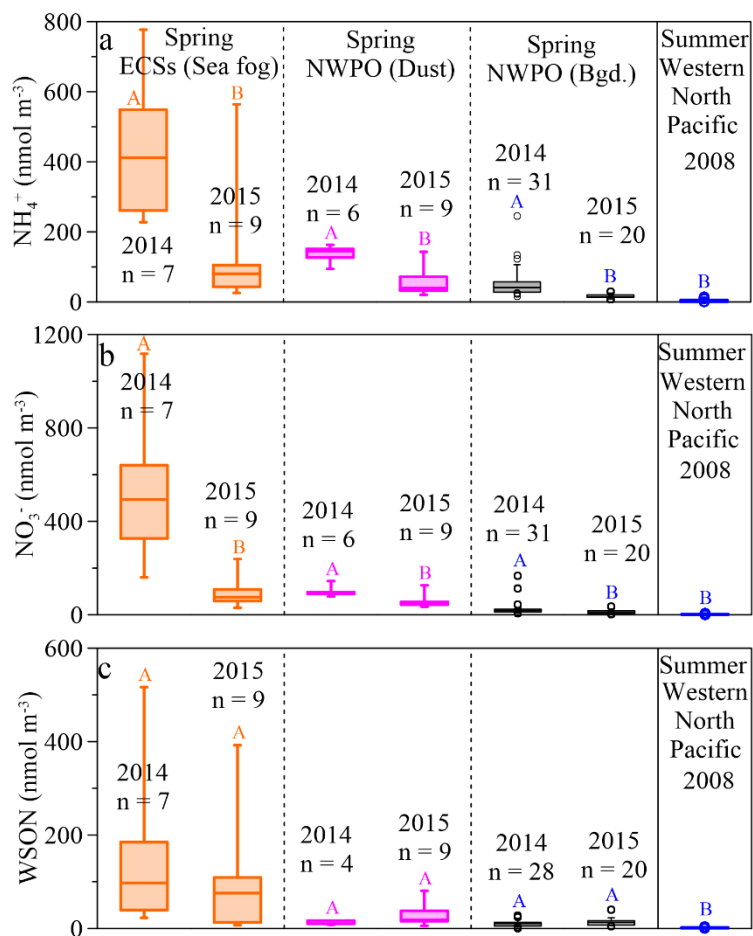

5

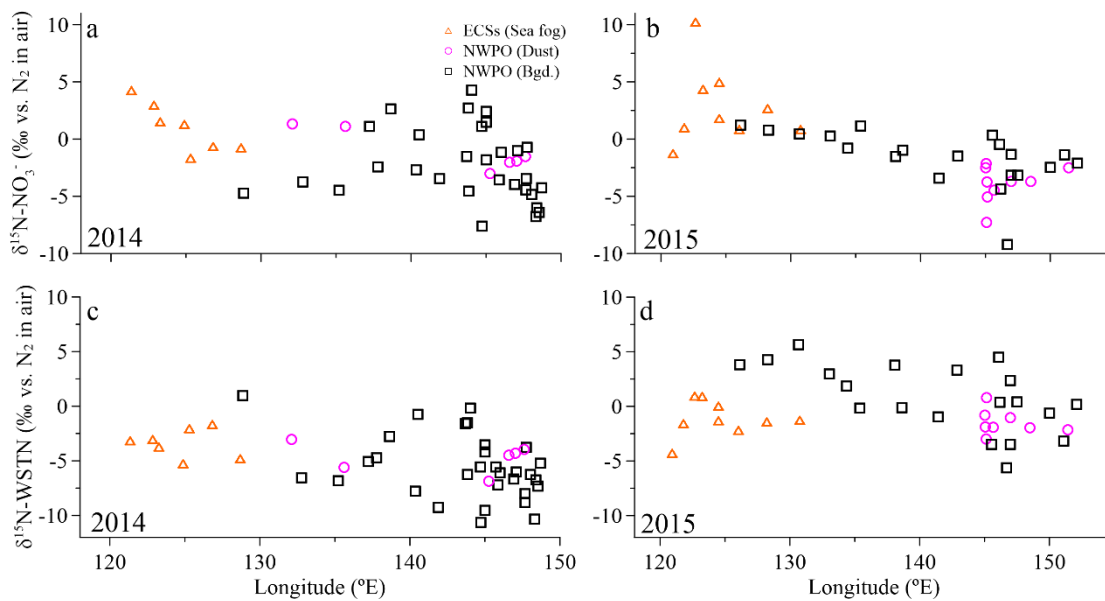

**Figure 4.** Aerosol  $\delta^{15}\text{N-NO}_3^-$  (a and b) and  $\delta^{15}\text{N-WSTN}$  (c and d) in the ECSs (the orange open triangles denote for sea-fog-modified aerosol), and in the NWPO (the pink open circles denote dust aerosol and the black open squares denote background aerosol) with longitude in the 2014 and 2015 cruise, respectively.

5

10

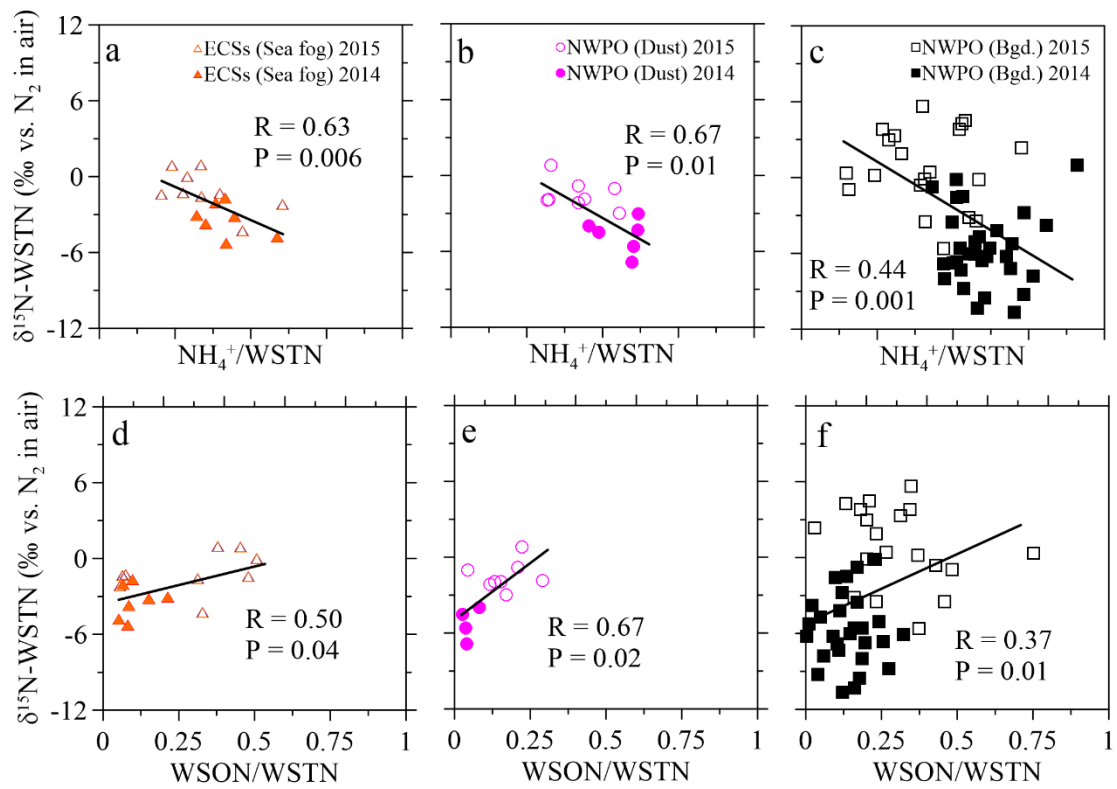

**Figure 5.** Scatter plots of  $\delta^{15}\text{N-WSTN}$  against the  $\text{NH}_4^+/\text{WSTN}$  ratio in (a) aerosol sampled in the ECSSs, (b) dust aerosol and (c) background aerosol collected in the NWPO. Scatter plots of aerosol  $\delta^{15}\text{N-WSTN}$  against the  $\text{WSON}/\text{WSTN}$  ratio in the (d) ECSSs, (e) dust aerosol and (f) background aerosol in the NWPO. The solid and open symbols indicate aerosol sampled in 2014 and 2015, respectively.

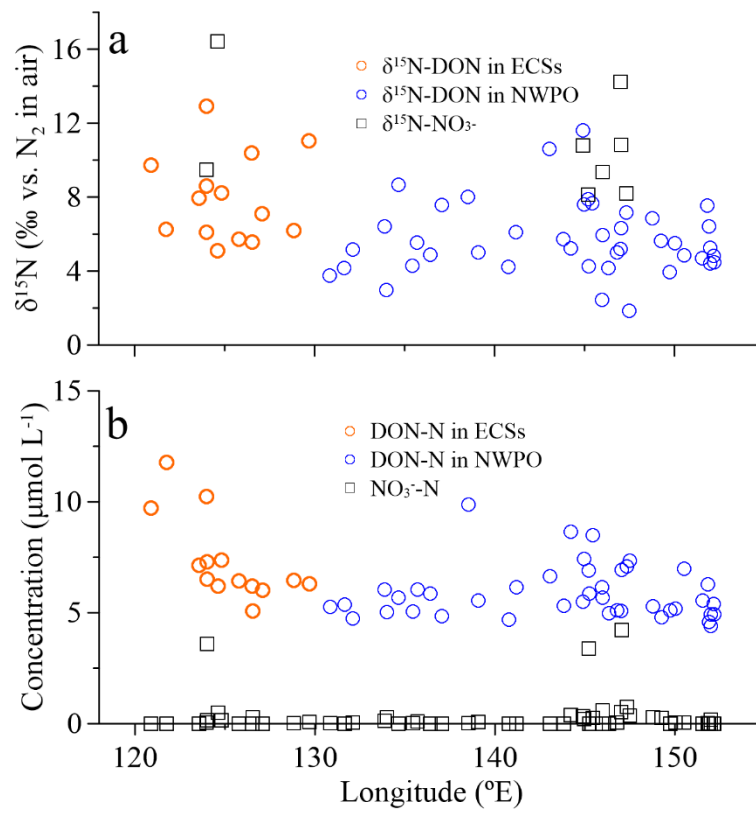

**Figure 6.** (a)  $\delta^{15}\text{N}$ -DON (open circles) and  $\delta^{15}\text{N}$ - $\text{NO}_3^-$  (black squares), and (b) concentrations of DON (open circles) and  $\text{NO}_3^-$  (black squares) in SSW with longitude during the 2015 cruise.

5

10

15

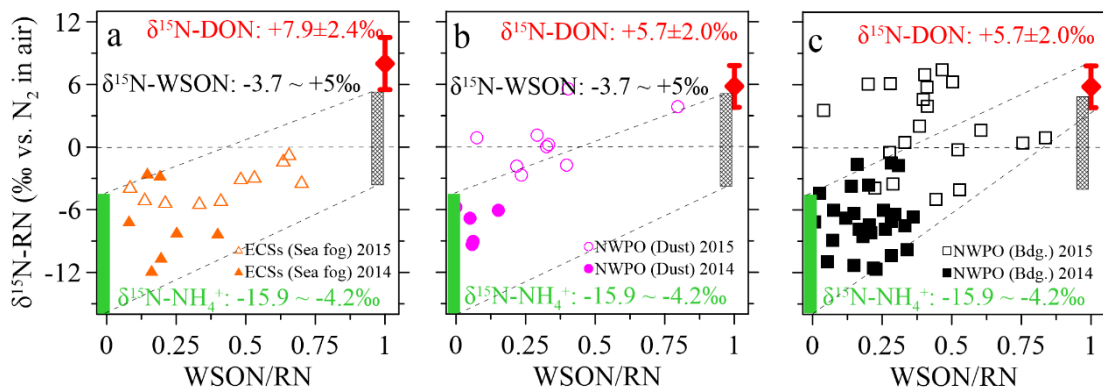

**Figure 7.** Scatter plots of aerosol  $\delta^{15}\text{N-RN}$  against the WSON/RN ratio in the (a) ECSs, (b) dust aerosol in the NWPO, and (c) background aerosol in the NWPO. The green bar indicates the sources of anthropogenic, terrestrial, and oceanic  $\delta^{15}\text{N-NH}_4^+$ , the gray bar indicates the sources of terrestrial and anthropogenic  $\delta^{15}\text{N-WSO}$ , and the red bar indicates the  $\delta^{15}\text{N-DON}$  in SSW.

5

10

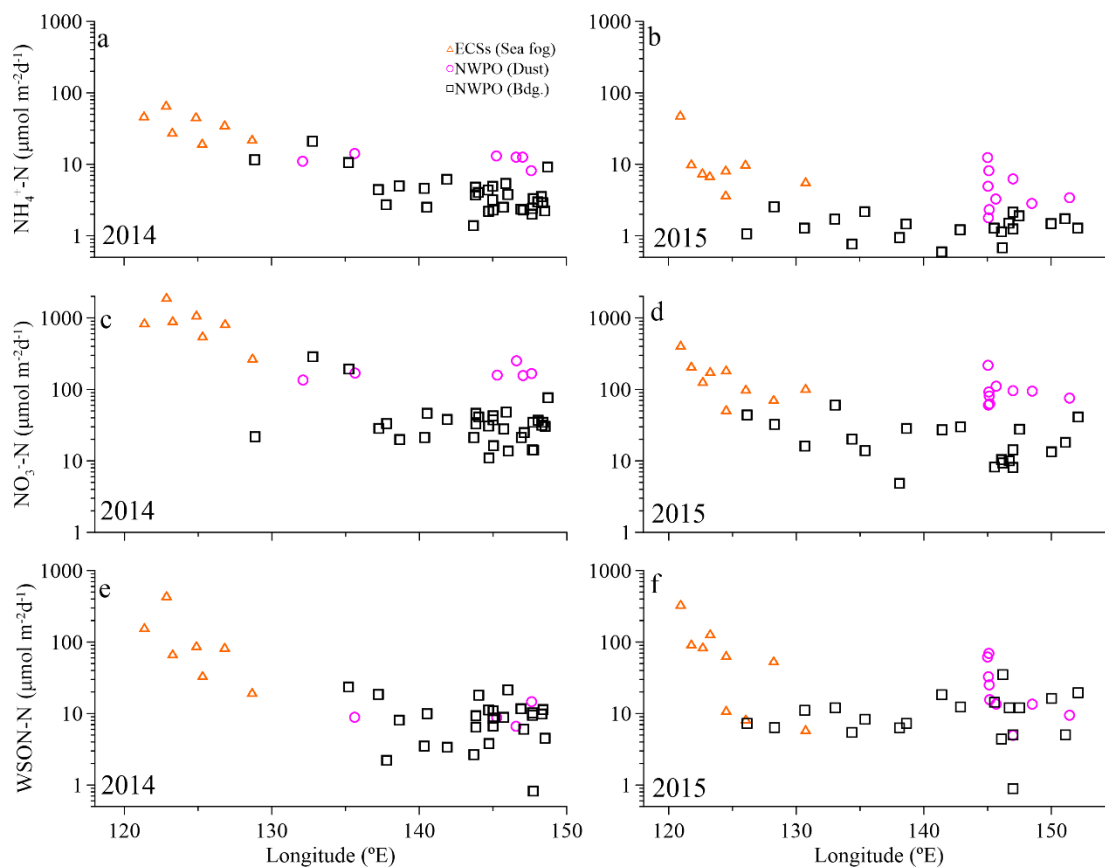

**Figure 8.** Dry deposition of aerosol  $\text{NO}_3^-\text{-N}$  (a and b),  $\text{NH}_4^+\text{-N}$  (c and d) and WSON-N (e and f) in the ECSs (orange open triangles) and in the NWPO (pink open circles for dust aerosol and black open squares for background aerosol) along longitude during the 2014 and 2015 cruise, respectively.
